# Supplementary material for: Digital Care Program for Urinary Incontinence in Females: A Large-Scale, Prospective, Cohort Study
Source: MDPI journal article supplement (doi:10.3390/healthcare12020141), 2024-01-08
Supplement: s1 [file s1]

# Digital Care Program for Urinary Incontinence in Females: a large-scale, prospective, cohort study

Dora Janela, Anabela C Areias, Maria Molinos, Robert G Moulder, Ivo Magalhães, Virgílio Bento, Marta Cardeano, Vijay Yanamadala, Fernando Dias Correia, Jennesa Atherton, Fabíola Costa

Supplementary Table S1. Details of the intervention protocol.

| Intervention Component                                                                           | Main goals                                                                                                                                      | Precautions            | Description                                                                                                                                                                                                                                                                                                                                                                                       |
|--------------------------------------------------------------------------------------------------|-------------------------------------------------------------------------------------------------------------------------------------------------|------------------------|---------------------------------------------------------------------------------------------------------------------------------------------------------------------------------------------------------------------------------------------------------------------------------------------------------------------------------------------------------------------------------------------------|
| Education:<br>Initial preparation before PFMT<br>Ongoing education                               | Improve patient's literacy on the condition                                                                                                     |                        | Main topics included on the initial preparation before PFMT:<br>Basic anatomy and physiology of the pelvic floor                                                                                                                                                                                                                                                                                  |
|                                                                                                  | Introduction to the basic technical aspects needed before initiating PFMT (contraction and relaxation techniques and breathing)                 |                        | The role and importance of exercise<br>How to contract and relax the PFM<br>Diaphragmatic breathing (which was adopted during PFMT)<br>How to insert, use, and sanitize the intravaginal sensor                                                                                                                                                                                                   |
|                                                                                                  | Facilitate the adoption of healthy lifestyle habits                                                                                             |                        | Ongoing education comprise the following topics:<br>Pathophysiology of the urinary condition<br>Contributing factors for the urinary condition<br>Relaxation techniques                                                                                                                                                                                                                           |
|                                                                                                  | Empowering patient's self-management of the condition                                                                                           |                        | Lifestyle modification advice and strategies<br>Bladder retraining and toileting techniques<br><br>These aspects were introduced after the completion of the initial preparation until the program-end.                                                                                                                                                                                           |
| Pelvic floor muscle Training (PFMT):<br>In isolation<br>In combination with functional exercises | Improve pelvic floor power, endurance, speed, and adaptability<br><br>Improve coordination between the PFM and surrounding muscle groups (e.g., | Avoid Valsava maneuver | Four categories of exercises were included, (all performed in a hooklying position):<br>1) Strength, requiring a maximum contraction of PFM;<br>2) Endurance, requiring a sustained contraction of the PFM at a target level;<br>3) Control, requiring contractions and relaxations at a target level ;<br>4) Agility, requiring rapid contractions followed by a relaxation at a target level to |

|                                                                                                                                                                                                                                                                                                                                                                                                                                     |                                                                                                                                                                                                                                                                                                                                                                                                                                                                                                                                                                                                                                                                                                                                                                                                                                                                                                                                                                                                                                                                       |
|-------------------------------------------------------------------------------------------------------------------------------------------------------------------------------------------------------------------------------------------------------------------------------------------------------------------------------------------------------------------------------------------------------------------------------------|-----------------------------------------------------------------------------------------------------------------------------------------------------------------------------------------------------------------------------------------------------------------------------------------------------------------------------------------------------------------------------------------------------------------------------------------------------------------------------------------------------------------------------------------------------------------------------------------------------------------------------------------------------------------------------------------------------------------------------------------------------------------------------------------------------------------------------------------------------------------------------------------------------------------------------------------------------------------------------------------------------------------------------------------------------------------------|
| abdominal muscles,<br>hip muscles)                                                                                                                                                                                                                                                                                                                                                                                                  | simulate the activity of the PFM in reflex<br>contractions, such as during cough.                                                                                                                                                                                                                                                                                                                                                                                                                                                                                                                                                                                                                                                                                                                                                                                                                                                                                                                                                                                     |
| Improve pelvic<br>girdle and pelvic<br>floor mobility                                                                                                                                                                                                                                                                                                                                                                               | <p>PFMT was combined with the following<br/>functional exercises (performed in different<br/>positions, i.e., hooklying and quadruped):</p> <ul style="list-style-type: none"> <li>- abdominal strengthening exercises</li> <li>- lower limb strengthening exercises</li> </ul> <p>Pelvic floor muscle exercises were initiated<br/>after the initial education.</p> <p>Afterwards, exercises were gradually<br/>progressed through the combination of<br/>PFMT with functional exercises (after at<br/>least 3 sessions until the program-end).</p> <p>Example of a session:</p> <ol style="list-style-type: none"> <li>1. Strength for 3 reps</li> <li>2. Control - Contraction 6:4 seconds on/off<br/>for 59 seconds (116 targets*)</li> <li>3. Hold - Contraction 2:2 seconds on/off for<br/>3 reps</li> <li>4. Agility - Contraction for 10 reps every 1<br/>second</li> <li>5. Bridge with Pelvic Floor Contractions for<br/>5 reps</li> <li>6. Hold - Contraction 3:3 seconds on/off for<br/>3 reps</li> <li>7. Diaphragmatic Breathing for 10 reps</li> </ol> |
| <p><b>Note:</b> Parameters of each exercise were adjusted by the physical therapist, such as the number of repetitions, sets, and duration of contractions and relaxations, according to the patient's condition. Participants were recommended to complete at least 3 sessions per week.</p> <p>*The target level refers to the degree of contraction or relaxation prescribed by the physical therapist for a given exercise.</p> |                                                                                                                                                                                                                                                                                                                                                                                                                                                                                                                                                                                                                                                                                                                                                                                                                                                                                                                                                                                                                                                                       |

**Supplementary Table S2.** Baseline Characteristics between Study Completers (N=264) and Non-Completers (N=62).

| Characteristic                                   | Completers<br>(N=264) | Non-completers<br>(N=62) | P    |
|--------------------------------------------------|-----------------------|--------------------------|------|
| <b>Age (years), mean (SD)</b>                    | 45.3 (9.1)            | 42.7 (9.1)               | .041 |
| <b>Age categories (years), N (%):</b>            |                       |                          | .030 |
| <25                                              | 0 (0)                 | 1 (1.6)                  |      |
| 25-40                                            | 93 (35.2)             | 27 (43.5)                |      |
| 41-54                                            | 120 (45.5)            | 29 (46.8)                |      |
| ≥55                                              | 51 (19.3)             | 5 (8.1)                  |      |
| <b>Gender, N (%)</b>                             |                       |                          | .627 |
| Female                                           | 263 (99.6)            | 62 (100)                 |      |
| Prefer not so to specify                         | 1 (0.4)               | 0 (0)                    |      |
| <b>BMI (kg/m<sup>2</sup>), mean (SD)</b>         | 29.2 (6.7)            | 31.7 (7.9)               | .009 |
| <b>BMI categories (kg/m<sup>2</sup>), N (%):</b> |                       |                          | .072 |
| Underweight (<18.5)                              | 3 (1.1)               | 0 (0)                    |      |
| Normal (18.5-25)                                 | 79 (29.9)             | 11 (17.7)                |      |
| Overweight (≥25-30)                              | 84 (31.8)             | 21 (33.9)                |      |
| Obese (≥30-40)                                   | 80 (30.3)             | 20 (32.3)                |      |
| Morbidly obese (>40)                             | 18 (6.8)              | 10 (16.1)                |      |
| <b>Employment status, N (%):</b>                 |                       |                          | .488 |
| Employed full-time                               | 219 (83.0)            | 56 (90.3)                |      |
| Employed part-time                               | 24 (9.1)              | 3 (4.8)                  |      |
| Unemployed (not working or retired)              | 18 (6.8)              | 3 (4.8)                  |      |
| Prefer not to specify                            | 3 (1.1)               | 0 (0)                    |      |
| <b>Education level, N (%):</b>                   |                       |                          | .846 |
| High school diploma or less than high school     | 19 (7.2)              | 3 (4.8)                  |      |
| Some college                                     | 68 (25.8)             | 17 (27.4)                |      |
| Bachelor's degree                                | 123 (46.6)            | 26 (41.9)                |      |
| Graduate degree                                  | 51 (19.3)             | 15 (24.2)                |      |
| Prefer not to specify                            | 3 (1.1)               | 1 (1.6)                  |      |
| <b>Race/ethnicity, N (%):</b>                    |                       |                          | .218 |
| Asian or Pacific Islander                        | 12 (4.5)              | 3 (4.8)                  |      |
| Black or African American                        | 7 (2.7)               | 6 (9.7)                  |      |
| Hispanic or Latino                               | 28 (10.6)             | 3 (4.8)                  |      |
| White or Caucasian                               | 201 (76.1)            | 48 (77.4)                |      |
| American Indian or Alaska Native                 | 5 (1.9)               | 0 (0)                    |      |

|                                          |             |             |      |
|------------------------------------------|-------------|-------------|------|
| Multi-racial or bi-racial                | 6 (2.3)     | 1 (1.6)     |      |
| Prefer not to specify                    | 4 (1.5)     | 1 (1.6)     |      |
| Not listed                               | 1 (0.4)     | 0 (0)       |      |
| <b>Urinary Incontinence Type, N (%):</b> |             |             | .721 |
| Mixed urinary incontinence               | 54 (20.5)   | 10 (16.1)   |      |
| Stress urinary incontinence              | 192 (72.7)  | 47 (75.8)   |      |
| Urgency urinary incontinence             | 18 (6.8)    | 5 (8.1)     |      |
| <b>Acuity, N (%):</b>                    |             |             | .368 |
| Less than 6 months                       | 21 (8.0)    | 8 (12.9)    |      |
| More than 6 months                       | 228 (86.4)  | 52 (83.9)   |      |
| Not available                            | 15 (5.7)    | 2 (3.2)     |      |
| <b>Parity<sup>a</sup>, mean (SD)</b>     | 2.0 (1.2)   | 1.8 (1.0)   | .271 |
| <b>Parity<sup>a</sup>, N (%):</b>        |             |             | .645 |
| Nulliparous                              | 16 (7.1)    | 6 (11.8)    |      |
| 1-2                                      | 145 (64.4)  | 33 (64.7)   |      |
| 3-5                                      | 63 (28.0)   | 12 (23.5)   |      |
| >5                                       | 1 (0.4)     | 0 (0)       |      |
| <b>Clinical scores, mean (SD)</b>        |             |             |      |
| UIQ-7                                    | 33.2 (25.1) | 26.7 (25.8) | .066 |
| PFIQ-7                                   | 60.9 (70.8) | 44.6 (62.1) | .098 |
| Medications consumption (yes), N (%)     | 5 (1.9)     | 2 (3.2)     | .515 |
| Intent to seek additional healthcare     | 4.2 (3.2)   | 4.7 (2.9)   | .269 |
| GAD-7 $\geq 5^b$                         | 9.0 (4.2)   | 9.1 (4.0)   | .876 |
| GAD-7                                    | 4.2 (4.9)   | 4.9 (5.1)   | .309 |
| PHQ-9 $\geq 5^c$                         | 10.0 (4.4)  | 12.8 (5.7)  | .027 |
| PHQ-9                                    | 2.9 (4.9)   | 3.9 (6.5)   | .145 |
| WPAI overall $>0^d$                      | 25.2 (15.7) | 32.8 (22.5) | .124 |
| WPAI overall <sup>e</sup>                | 10.2 (15.9) | 15.5 (22.5) | .111 |
| WPAI work $>0^f$                         | 24.0 (14.3) | 31.2 (22.8) | .145 |
| WPAI work <sup>e</sup>                   | 9.4 (14.7)  | 14.7 (22.1) | .098 |
| WPAI time $>0^g$                         | 14.1 (12.2) | 8.8 (7.6)   | .328 |
| WPAI time <sup>e</sup>                   | 1.2 (5.2)   | 1.0 (3.7)   | .821 |

**Abbreviations:** BMI, body mass index; GAD-7, Generalized Anxiety Disorder 7-item scale; PFIQ-7, Pelvic Floor Impact Questionnaire - short form 7; PHQ-9, Patient Health 9-item questionnaire; UIQ-7, Urinary Impact Questionnaire - short form 7; WPAI, Work Productivity and Activity Impairment Questionnaire.

**Notes:** a: Completers: N= 225 and Non-completers N=51; b: Completers: N= 107 and Non-completers N=30; c: Completers: N= 68 and Non-completers N=18; d: Completers: N= 88 and Non-completers N=25; e: Completers: N= 218 and Non-completers

N=53; f: Completers: N= 85 and Non-completers N=25; g: Completers: N= 18 and Non-completers N=6.

**Supplementary Table S3.** Unconditional model estimations and model fit: intention-to-treat approach.

| Outcome                                 | N   | Intercept   |          | Slope      |          | Fit         |          |       |       |       |
|-----------------------------------------|-----|-------------|----------|------------|----------|-------------|----------|-------|-------|-------|
|                                         |     | Mean (SD)   | <i>p</i> | Mean (SD)  | <i>p</i> | Chi-sq (df) | <i>p</i> | CFI   | RMSEA | SRMR  |
| UIQ-7 >0                                | 311 | 33.6 (10.5) | <.001    | -0.9 (0)   | <.001    | 0.012 (1)   | 0.914    | 1.000 | 0.000 | 0.008 |
| PFIQ-7 >0                               | 313 | 60.1 (32.6) | <.001    | -1.8 (4.9) | .004     | 0.001 (1)   | 0.977    | 1.000 | 0.000 | 0.001 |
| Intent to seek additional healthcare >0 | 274 | 4.9 (1.5)   | <.001    | -0.3 (0.2) | <.001    | 22.807 (1)  | 0.000    | 0.702 | 0.282 | 0.119 |
| Intent to seek additional healthcare    | 326 | 4.1 (1.4)   | <.001    | -0.2 (0.1) | <.001    | 10.359 (1)  | 0.001    | 0.888 | 0.169 | 0.069 |
| GAD-7 ≥5                                | 137 | 9.0 (3.8)   | <.001    | -0.3 (0.4) | <.001    | 4.752 (1)   | 0.029    | 0.939 | 0.165 | 0.073 |
| GAD-7                                   | 326 | 4.3 (4.1)   | <.001    | -0.1 (0.3) | .003     | 0.016 (1)   | 0.899    | 1.000 | 0.000 | 0.002 |
| PHQ-9 ≥5                                | 86  | 10.6 (5.0)  | <.001    | -0.4 (0.5) | <.001    | 0.483 (1)   | 0.487    | 1.000 | 0.000 | 0.058 |
| PHQ-9                                   | 326 | 3.0 (4.8)   | <.001    | -0.1 (0.3) | .162     | 0.215 (1)   | 0.643    | 1.000 | 0.000 | 0.010 |
| WPAI Overall >0                         | 113 | 24.7 (7.4)  | <.001    | -0.8 (1.6) | .004     | 9.230 (1)   | 0.002    | 0.600 | 0.254 | 0.133 |
| WPAI Overall                            | 271 | 11.1 (9.1)  | <.001    | -0.2 (0.4) | .108     | 0.001 (1)   | 0.972    | 1.000 | 0.000 | 0.001 |
| WPAI Work >0                            | 110 | 23.8 (9.2)  | <.001    | -0.8 (1.6) | <.001    | 8.213 (1)   | 0.004    | 0.761 | 0.240 | 0.126 |
| WPAI Work                               | 271 | 10.3 (10.3) | <.001    | -0.2 (1.0) | .169     | 0.033 (1)   | 0.855    | 1.000 | 0.000 | 0.004 |
| WPAI Time >0                            | 24  | 7.2 (0)     | .079     | -0.7 (0.1) | .097     | 9.680 (1)   | 0.002    | 0.000 | 0.472 | 0.315 |
| WPAI Time                               | 271 | 1.1 (0.1)   | <.001    | 0 (0)      | .875     | 0.056 (1)   | 0.813    | 1.000 | 0.000 | 0.008 |

**Abbreviations:** GAD-7, Generalized Anxiety Disorder 7-item scale; PFIQ-7, Pelvic Floor Impact Questionnaire - short form 7; PHQ-9, Patient Health 9-item questionnaire; UIQ-7, Urinary Impact Questionnaire - short form 7; WPAI, Work Productivity and Activity Impairment Questionnaire.

**Note:** Model fitness was assessed through chi-squared test, root mean square error of approximation (RMSEA), confirmatory fit index (CFI), and standardized root mean square residual (SRMR), according to the criteria: CFI = close to 0.95; RMSEA = close to 0.06 and SRMR = close to 0.08. Significant p-values and model fit values indicating good model fit are presented in italic.

**Supplementary Table S4.** Conditional model with age, body mass index and parity as covariates.

| Outcome                                    | Age           |                    |       |                 | BMI   |                    |       |                 | Parity |                     |       |                    | FIT   |             |       |       |       |       |
|--------------------------------------------|---------------|--------------------|-------|-----------------|-------|--------------------|-------|-----------------|--------|---------------------|-------|--------------------|-------|-------------|-------|-------|-------|-------|
|                                            | Mean (95% CI) | Intercept          | P     | Slope           | P     | Intercept          | P     | Slope           | P      | Intercept           | P     | Slope              | P     | Chi-sq (df) | P     | CFI   | RMSEA | SRMR  |
| UIQ-7 >0                                   |               | 0.5<br>(0.2;0.9)   | 0.001 | 0<br>(-0.1;0)   | 0.183 | 0.3<br>(-0.1;0.7)  | 0.187 | 0<br>(-0.1;0)   | 0.644  | 0.5<br>(-1.8;2.7)   | 0.687 | 0.2<br>(-0.3;0.6)  | 0.536 | 0.554 (4)   | 0.968 | 1.000 | 0.000 | 0.011 |
| PFIQ-7 >0                                  |               | 1.2<br>(0.3;2.1)   | 0.007 | 0<br>(-0.2;0.1) | 0.537 | 0.2<br>(-0.9;1.3)  | 0.668 | 0<br>(-0.2;0.2) | 0.925  | 2.2<br>(-4.3;8.7)   | 0.509 | 0.3<br>(-1.1;1.7)  | 0.694 | 1.434 (4)   | 0.838 | 1.000 | 0.000 | 0.016 |
| Intent to seek additional<br>healthcare >0 |               | 0.04<br>(0;0.1)    | 0.024 | 0<br>(0;0)      | 0.707 | 0<br>(-0.1;0)      | 0.352 | 0<br>(0;0)      | 0.757  | 0<br>(-0.3;0.3)     | 0.777 | 0<br>(-0.1;0.1)    | 0.864 | 19.733 (4)  | 0.001 | 0.732 | 0.129 | 0.079 |
| Intent to seek additional<br>healthcare    |               | 0.04<br>(0;0.1)    | 0.029 | 0<br>(0;0)      | 0.641 | 0<br>(-0.1;0)      | 0.567 | 0<br>(0;0)      | 0.791  | -0.2<br>(-0.5;0.1)  | 0.225 | 0<br>(0;0.1)       | 0.876 | 10.710 (4)  | 0.030 | 0.899 | 0.078 | 0.047 |
| GAD-7 ≥5                                   |               | 0<br>(-0.1;0.1)    | 0.899 | 0<br>(0;0)      | 0.908 | 0<br>(-0.1;0.1)    | 0.466 | 0<br>(0;0)      | 0.569  | -0.3<br>(-0.9;0.3)  | 0.273 | 0.1<br>(0;0.2)     | 0.169 | 6.415 (4)   | 0.170 | 0.953 | 0.072 | 0.058 |
| GAD-7                                      |               | 0<br>(-0.1;0.1)    | 0.910 | 0<br>(0;0)      | 0.363 | 0.1<br>(0;0.2)     | 0.040 | 0<br>(0;0)      | 0.585  | -0.4<br>(-0.8;0)    | 0.075 | 0<br>(-0.1;0.1)    | 0.503 | 3.020 (4)   | 0.555 | 1.000 | 0.000 | 0.016 |
| PHQ-9 ≥5                                   |               | 0<br>(-0.1;0.1)    | 0.726 | 0<br>(0;0)      | 0.479 | 0.1<br>(-0.1;0.2)  | 0.207 | 0<br>(0;0)      | 0.470  | 0.6<br>(-0.4;1.6)   | 0.230 | 0<br>(-0.1;0.2)    | 0.652 | 6.446 (4)   | 0.168 | 0.878 | 0.094 | 0.083 |
| PHQ-9                                      |               | 0<br>(0;0.1)       | 0.280 | 0<br>(0;0)      | 0.796 | 0.1<br>(0.1;0.2)   | 0.001 | 0<br>(0;0)      | 0.081  | -0.2<br>(-0.6;0.3)  | 0.503 | 0<br>(-0.1;0.1)    | 0.744 | 6.746 (4)   | 0.150 | 0.982 | 0.050 | 0.029 |
| WPAI Overall >0                            |               | -0.4<br>(-0.9;0)   | 0.039 | 0<br>(-0.1;0.1) | 0.817 | -0.2<br>(-0.5;0.2) | 0.350 | 0<br>(-0.1;0.1) | 0.912  | -3.5<br>(-6.3;-0.8) | 0.012 | -0.2<br>(-0.6;0.3) | 0.438 | 13.578 (4)  | 0.009 | 0.705 | 0.130 | 0.072 |
| WPAI Overall                               |               | -0.1<br>(-0.3;0.1) | 0.325 | 0<br>(-0.1;0)   | 0.336 | 0.2<br>(-0.1;0.4)  | 0.197 | 0<br>(-0.1;0)   | 0.260  | -2.6<br>(-4.7;-0.6) | 0.012 | 0<br>(-0.2;0.2)    | 0.859 | 3.928 (4)   | 0.416 | 1.000 | 0.000 | 0.035 |
| WPAI Work >0                               |               | -0.2<br>(-0.6;0.1) | 0.187 | 0<br>(-0.1;0.1) | 0.994 | -0.1<br>(-0.4;0.2) | 0.563 | 0<br>(0;0.1)    | 0.677  | -3.4<br>(-5.9;-0.9) | 0.008 | -0.1<br>(-0.5;0.3) | 0.562 | 10.071 (4)  | 0.039 | 0.829 | 0.104 | 0.072 |
| WPAI Work                                  |               | 0<br>(-0.2;0.2)    | 0.737 | 0<br>(-0.1;0)   | 0.070 | 0.2<br>(0;0.5)     | 0.077 | 0<br>(-0.1;0)   | 0.060  | -2.7<br>(-4.5;-0.9) | 0.003 | 0<br>(-0.2;0.2)    | 0.847 | 1.552 (4)   | 0.817 | 1.000 | 0.000 | 0.015 |
| WPAI Time*                                 |               | -0.1<br>(-0.2;0)   | 0.015 | 0<br>(0;0)      | 0.560 | 0<br>(-0.1;0)      | 0.230 | 0<br>(0;0)      | 0.210  | 0<br>(-0.7;0.6)     | 0.977 | 0<br>(-0.1;0.1)    | 0.525 | 4.111 (4)   | 0.391 | 0.977 | 0.010 | 0.043 |

**Abbreviations:** BMI, body mass index; GAD-7, Generalized Anxiety Disorder 7-item scale; PFIQ-7, Pelvic Floor Impact Questionnaire - short form 7; PHQ-9, Patient Health 9-item questionnaire; UIQ-7, Urinary Impact Questionnaire - short form 7; WPAI, Work Productivity and Activity Impairment Questionnaire.

**Note:** Model fitness was assessed through chi-squared test, root mean square error of approximation (RMSEA), confirmatory fit index (CFI), and standardized root mean square residual (SRMR), according to the criteria: CFI = close to 0.95; RMSEA = close to 0.06 and SRMR = close to 0.08. Significant p-values and model fit values indicating good model fit are presented in bold.

\*The conditional model for WPAI Time in filtered cases did not converge.



**Supplementary Table S5.** Adverse events reported across the intervention classified by condition and non-condition related.

| Type                     | Occurrence (#N) | Description                                              |
|--------------------------|-----------------|----------------------------------------------------------|
| Intervention-related     | 1               | Right sided pelvic pain and pressure                     |
|                          | 1               | Urinary Tract Infection                                  |
|                          | 2               | Muscle soreness/cramping                                 |
|                          | 1               | Worsening leak episodes                                  |
|                          | 1               | Pain inserting the pod                                   |
|                          | 1               | Yeast infection                                          |
| Non-intervention related | 6               | Unrelated medical illness (including COVID-19 infection) |
|                          | 1               | Surgical procedure for lysis of bladder scar             |
|                          | 1               | Unrelated surgery to another body area                   |
|                          | 1               | Unrelated injury to another body area                    |
